# Supplementary material
Source: PubMed Central journal article supplement (PMC4788082)
Supplement: turm819771.ww1_default.pdf [file turm819771.ww1_default.pdf]

## APPENDIX

### ICD-9 and ICD-10 Diagnostic codes

| Fracture Site/Context                     | ICD-9 Code                                               | ICD-10 Code                                                                   |
|-------------------------------------------|----------------------------------------------------------|-------------------------------------------------------------------------------|
| wrist/forearm                             | 813, 814, 815                                            | S52, S62.0-S62.4,<br>S62.8                                                    |
| shoulder/upper arm                        | 812                                                      | S42.2-S42.4, S42.7-<br>S42.9                                                  |
| thoracic spine                            | 805.2, 805.3                                             | S22.0, S22.1                                                                  |
| lumbar spine and pelvis                   | 733.98, 805.4, 805.5,<br>808                             | S32                                                                           |
| hip/femur                                 | 733.96, 733.97, 820,<br>821                              | S72                                                                           |
| lower leg/ankle                           | 733.93, 822, 823, 824                                    | S82                                                                           |
| seizure                                   | 345, 780.3                                               | G40, G41, R56                                                                 |
| trauma                                    | E800-E848, E881,<br>E882, E908, E909,<br>E916-E919, E960 | T79, T98, V01-V99,<br>W11-W17, W50-W52,<br>W64, X34-X39, Y01-<br>Y04, Y30-Y32 |
| bone malignancy (primary<br>or secondary) | 198.5, 170                                               | C40, C41                                                                      |
| multiple myeloma                          | 203                                                      | C90                                                                           |
| pathological fracture                     | 733.1                                                    | M84.4, M90.7                                                                  |
